# Supplementary material
Source: Springer Nature journal article supplement (https://www.springermedizin.de/resource/supplementary/13643_2012_50_MOESM7_ESM.pdf/9681370)
Supplement: MOESM7 [file 9681370]

## Annotation of views studies: Summary against adaptive mechanisms

**Key:** sound (+++), moderate (++), partial (+) or no evidence (X)

| First Author & Location                                            | Study aims                                                                                                                                | Relevance and cultural appropriateness of 'authenticity' | Relevance and cultural appropriateness of 'understanding' | Relevance and cultural appropriateness of 'consonance' | Relevance and cultural appropriateness of 'specificity' | Relevance and cultural appropriateness of 'embeddedness' | Relevance and cultural appropriateness of 'endorsement' | Relevance and cultural appropriateness of 'framing' |
|--------------------------------------------------------------------|-------------------------------------------------------------------------------------------------------------------------------------------|----------------------------------------------------------|-----------------------------------------------------------|--------------------------------------------------------|---------------------------------------------------------|----------------------------------------------------------|---------------------------------------------------------|-----------------------------------------------------|
| <b>Anderson (2004)<br/>London, UK</b>                              | Explore the lived experiences of immigrant women with HIV                                                                                 | X                                                        | X                                                         | +++                                                    | +                                                       | +                                                        | ++                                                      | +++                                                 |
| <b>Apostolopoulos (2006)<br/>Arizona &amp; South Carolina, USA</b> | Examine intertwined individual and environmental factors in relation to HIV/STI risks among male –gay and straight-immigrant farm workers | X                                                        | +                                                         | ++                                                     | +                                                       | ++                                                       | X                                                       | +++                                                 |
| <b>Ayala (2001)<br/>Miami, New York City, Los Angeles, USA</b>     | Analyze the relationship between race, class, and unprotected sex among gay men                                                           | +                                                        | +                                                         | ++                                                     | +                                                       | +++                                                      | +                                                       | +++                                                 |

| <b>First Author &amp; Location</b>                | <b>Study aims</b>                                                                                       | <b>Relevance and cultural appropriateness of ‘authenticity’</b> | <b>Relevance and cultural appropriateness of ‘understanding’</b> | <b>Relevance and cultural appropriateness of ‘consonance’</b> | <b>Relevance and cultural appropriateness of ‘specificity’</b> | <b>Relevance and cultural appropriateness of ‘embeddedness’</b> | <b>Relevance and cultural appropriateness of ‘endorsement’</b> | <b>Relevance and cultural appropriateness of ‘framing’</b> |
|---------------------------------------------------|---------------------------------------------------------------------------------------------------------|-----------------------------------------------------------------|------------------------------------------------------------------|---------------------------------------------------------------|----------------------------------------------------------------|-----------------------------------------------------------------|----------------------------------------------------------------|------------------------------------------------------------|
| <b>Bhattacharya (2004)<br/>New York City, USA</b> | Explore social capital resources and influences on HIV risk behaviours among immigrant heterosexual men | X                                                               | X                                                                | ++                                                            | ++                                                             | ++                                                              | ++                                                             | ++                                                         |
| <b>Castro-Vazquez (2006)<br/>Japan</b>            | Explore the relationship between HIV/AIDS and ‘community’ support for immigrants with HIV               | X                                                               | ++                                                               | +++                                                           | +++                                                            | +                                                               | +                                                              | +++                                                        |
| <b>Chin (1999)<br/>Los Angeles, USA</b>           | Explore how immigrant women assess HIV risk in social interactions                                      | X                                                               | X                                                                | ++                                                            | X                                                              | X                                                               | X                                                              | +                                                          |
| <b>Chin (2007)<br/>New York City, USA</b>         | Explore the experiences and needs of immigrants living with HIV/AIDS                                    | ++                                                              | +++                                                              | ++                                                            | ++                                                             | +++                                                             | +++                                                            | +++                                                        |

| <b>First Author &amp; Location</b>                                  | <b>Study aims</b>                                                                                                                 | <b>Relevance and cultural appropriateness of 'authenticity'</b> | <b>Relevance and cultural appropriateness of 'understanding'</b> | <b>Relevance and cultural appropriateness of 'consonance'</b> | <b>Relevance and cultural appropriateness of 'specificity'</b> | <b>Relevance and cultural appropriateness of 'embeddedness'</b> | <b>Relevance and cultural appropriateness of 'endorsement'</b> | <b>Relevance and cultural appropriateness of 'framing'</b> |
|---------------------------------------------------------------------|-----------------------------------------------------------------------------------------------------------------------------------|-----------------------------------------------------------------|------------------------------------------------------------------|---------------------------------------------------------------|----------------------------------------------------------------|-----------------------------------------------------------------|----------------------------------------------------------------|------------------------------------------------------------|
| <b>Chinouya (2006)<br/>Milton Keynes, UK</b>                        | Explore the role of faith, family life, service utilization and coping among immigrants living with HIV                           | +                                                               | X                                                                | +++                                                           | X                                                              | +++                                                             | +++                                                            | +++                                                        |
| <b>Dawson (2001)<br/>Melbourne, Australia</b>                       | Explore immigrant women's gender and sexual identities in relation to HIV and sexual health                                       | X                                                               | X                                                                | +++                                                           | +++                                                            | +                                                               | ++                                                             | +++                                                        |
| <b>Dawson (2003)<br/>Melbourne, Australia &amp; Santiago, Chile</b> | Explore past/present social changes on life experiences related to HIV/AIDS among immigrant women and women in the 'home' country | X                                                               | +                                                                | ++                                                            | +                                                              | X                                                               | X                                                              | ++                                                         |

| <b>First Author &amp; Location</b>                           | <b>Study aims</b>                                                                                                                      | <b>Relevance and cultural appropriateness of 'authenticity'</b> | <b>Relevance and cultural appropriateness of 'understanding'</b> | <b>Relevance and cultural appropriateness of 'consonance'</b> | <b>Relevance and cultural appropriateness of 'specificity'</b> | <b>Relevance and cultural appropriateness of 'embeddedness'</b> | <b>Relevance and cultural appropriateness of 'endorsement'</b> | <b>Relevance and cultural appropriateness of 'framing'</b> |
|--------------------------------------------------------------|----------------------------------------------------------------------------------------------------------------------------------------|-----------------------------------------------------------------|------------------------------------------------------------------|---------------------------------------------------------------|----------------------------------------------------------------|-----------------------------------------------------------------|----------------------------------------------------------------|------------------------------------------------------------|
| <b>Diaz (1999)</b><br>Miami, New York City, Los Angeles, USA | Explore high rates of unprotected anal intercourse among immigrant gay and bisexual men                                                | X                                                               | +                                                                | +++                                                           | ++                                                             | X                                                               | X                                                              | ++                                                         |
| <b>Diaz (2000)</b><br>Miami, New York City, Los Angeles, USA | Explore impact of poverty, racism and homophobia on sexual risks, substance use & psych. distress among immigrant gay and bisexual men | X                                                               | X                                                                | +++                                                           | +                                                              | X                                                               | X                                                              | +++                                                        |
| <b>Dodds (2006)</b><br>UK                                    | Explore social discourses on HIV-related stigma among people incl. HIV-positive immigrants                                             | ++                                                              | X                                                                | +++                                                           | ++                                                             | +++                                                             | +                                                              | +++                                                        |

| <b>First Author &amp; Location</b> | <b>Study aims</b>                                                                                                                   | <b>Relevance and cultural appropriateness of ‘authenticity’</b> | <b>Relevance and cultural appropriateness of ‘understanding’</b> | <b>Relevance and cultural appropriateness of ‘consonance’</b> | <b>Relevance and cultural appropriateness of ‘specificity’</b> | <b>Relevance and cultural appropriateness of ‘embeddedness’</b> | <b>Relevance and cultural appropriateness of ‘endorsement’</b> | <b>Relevance and cultural appropriateness of ‘framing’</b> |
|------------------------------------|-------------------------------------------------------------------------------------------------------------------------------------|-----------------------------------------------------------------|------------------------------------------------------------------|---------------------------------------------------------------|----------------------------------------------------------------|-----------------------------------------------------------------|----------------------------------------------------------------|------------------------------------------------------------|
| <b>Dodds (2004)<br/>UK</b>         | Explore social discourses around HIV-related stigma and discrimination among a range of people including immigrants living with HIV | X                                                               | X                                                                | ++                                                            | +                                                              | +++                                                             | +                                                              | +++                                                        |
| <b>Doyal (2003)<br/>London, UK</b> | Explore the lived experiences of immigrant women with HIV                                                                           | X                                                               | X                                                                | +++                                                           | ++                                                             | ++                                                              | ++                                                             | +++                                                        |
| <b>Doyal (2005)<br/>London, UK</b> | Explore the lived experiences of immigrant women with HIV                                                                           | X                                                               | X                                                                | +++                                                           | X                                                              | ++                                                              | X                                                              | +++                                                        |

| <b>First Author &amp; Location</b>           | <b>Study Aims</b>                                                                                                  | <b>Relevance and cultural appropriateness of ‘authenticity’</b> | <b>Relevance and cultural appropriateness of ‘understanding’</b> | <b>Relevance and cultural appropriateness of ‘consonance’</b> | <b>Relevance and cultural appropriateness of ‘specificity’</b> | <b>Relevance and cultural appropriateness of ‘embeddedness’</b> | <b>Relevance and cultural appropriateness of ‘endorsement’</b> | <b>Relevance and cultural appropriateness of ‘framing’</b> |
|----------------------------------------------|--------------------------------------------------------------------------------------------------------------------|-----------------------------------------------------------------|------------------------------------------------------------------|---------------------------------------------------------------|----------------------------------------------------------------|-----------------------------------------------------------------|----------------------------------------------------------------|------------------------------------------------------------|
| <b>Doyal (2006)<br/>London, UK</b>           | Explore the lived experiences of immigrant women with HIV                                                          | X                                                               | X                                                                | ++                                                            | X                                                              | +                                                               | X                                                              | ++                                                         |
| <b>Flaskerud (1991)<br/>Los Angeles, USA</b> | Explore HIV/AIDS health beliefs, and their relationship to ‘traditional’ beliefs, among low-income immigrant women | X                                                               | ++                                                               | ++                                                            | +++                                                            | X                                                               | X                                                              | ++                                                         |
| <b>Flaskerud (1996)<br/>Los Angeles, USA</b> | Explore sexual practices, attitudes and knowledge related to HIV transmission among low-income immigrant women     | X                                                               | +                                                                | +++                                                           | X                                                              | X                                                               | X                                                              | +++                                                        |

| <b>First Author &amp; Location</b>               | <b>Study aims</b>                                                                                                   | <b>Relevance and cultural appropriateness of ‘authenticity’</b> | <b>Relevance and cultural appropriateness of ‘understanding’</b> | <b>Relevance and cultural appropriateness of ‘consonance’</b> | <b>Relevance and cultural appropriateness of ‘specificity’</b> | <b>Relevance and cultural appropriateness of ‘embeddedness’</b> | <b>Relevance and cultural appropriateness of ‘endorsement’</b> | <b>Relevance and cultural appropriateness of ‘framing’</b> |
|--------------------------------------------------|---------------------------------------------------------------------------------------------------------------------|-----------------------------------------------------------------|------------------------------------------------------------------|---------------------------------------------------------------|----------------------------------------------------------------|-----------------------------------------------------------------|----------------------------------------------------------------|------------------------------------------------------------|
| <b>Gifford (1998)<br/>Melbourne, Australia</b>   | Explore ways in which immigrant women understand risks to sexual health including HIV                               | X                                                               | ++                                                               | +++                                                           | +++                                                            | +++                                                             | +                                                              | +++                                                        |
| <b>Hirsch (2002)<br/>Atlanta, USA and Mexico</b> | Explore social constructions of HIV risks among immigrant women and women in the ‘home’ country                     | X                                                               | +++                                                              | ++                                                            | ++                                                             | +                                                               | X                                                              | +++                                                        |
| <b>Jemmott (1999)<br/>New York City, USA</b>     | Explore perceptions of HIV risks and culturally appropriate considerations for HIV prevention among immigrant women | X                                                               | +++                                                              | ++                                                            | +++                                                            | ++                                                              | +                                                              | +++                                                        |

| <b>First Author &amp; Location</b>          | <b>Study aims</b>                                                                                                    | <b>Relevance and cultural appropriateness of ‘authenticity’</b> | <b>Relevance and cultural appropriateness of ‘understanding’</b> | <b>Relevance and cultural appropriateness of ‘consonance’</b> | <b>Relevance and cultural appropriateness of ‘specificity’</b> | <b>Relevance and cultural appropriateness of ‘embeddedness’</b> | <b>Relevance and cultural appropriateness of ‘endorsement’</b> | <b>Relevance and cultural appropriateness of ‘framing’</b> |
|---------------------------------------------|----------------------------------------------------------------------------------------------------------------------|-----------------------------------------------------------------|------------------------------------------------------------------|---------------------------------------------------------------|----------------------------------------------------------------|-----------------------------------------------------------------|----------------------------------------------------------------|------------------------------------------------------------|
| <b>Kang (2003)<br/>New York City, USA</b>   | Explore cultural attitudes, and HIV-related behaviours and perceptions among undocumented immigrants living with HIV | +++                                                             | +++                                                              | +++                                                           | ++                                                             | +                                                               | X                                                              | +++                                                        |
| <b>Korner (2007a)<br/>Sydney, Australia</b> | Explore the lived experience of immigrants living with HIV/AIDS – residency issues                                   | +++                                                             | +++                                                              | ++                                                            | ++                                                             | +                                                               | X                                                              | +++                                                        |
| <b>Korner (2007b)<br/>Sydney, Australia</b> | Explore the lived experience of immigrants living with HIV/AIDS – late HIV diagnosis                                 | X                                                               | +                                                                | +++                                                           | +                                                              | +                                                               | X                                                              | +++                                                        |



| <b>First Author &amp; Location</b>              | <b>Study aims</b>                                                                   | <b>Relevance and cultural appropriateness of ‘authenticity’</b> | <b>Relevance and cultural appropriateness of ‘understanding’</b> | <b>Relevance and cultural appropriateness of ‘consonance’</b> | <b>Relevance and cultural appropriateness of ‘specificity’</b> | <b>Relevance and cultural appropriateness of ‘embeddedness’</b> | <b>Relevance and cultural appropriateness of ‘endorsement’</b> | <b>Relevance and cultural appropriateness of ‘framing’</b> |
|-------------------------------------------------|-------------------------------------------------------------------------------------|-----------------------------------------------------------------|------------------------------------------------------------------|---------------------------------------------------------------|----------------------------------------------------------------|-----------------------------------------------------------------|----------------------------------------------------------------|------------------------------------------------------------|
| <b>Korner (2007c)<br/>Sydney, Australia</b>     | Explore the lived experience of immigrants living with HIV/AIDS – disclosure issues | X                                                               | +++                                                              | +++                                                           | +                                                              | +                                                               | X                                                              | +++                                                        |
| <b>Korner (2005)<br/>Sydney, Australia</b>      | Explore the lived experience of immigrants living with HIV/AIDS                     | +++                                                             | +++                                                              | +++                                                           | X                                                              | X                                                               | X                                                              | +++                                                        |
| <b>McQuiston (1998)<br/>North Carolina, USA</b> | Explore the preventive practices for HIV and STIs of newly arrived immigrants       | X                                                               | +++                                                              | +++                                                           | +++                                                            | ++                                                              | X                                                              | +++                                                        |
| <b>McQuiston (2000)<br/>North Carolina, USA</b> | Explore the preventive practices for HIV of newly arrived immigrants                | X                                                               | +                                                                | ++                                                            | +++                                                            | +                                                               | X                                                              | +++                                                        |

| <b>First Author &amp; Location</b>          | <b>Study Aims</b>                                                                                                                                                                        | <b>Relevance and cultural appropriateness of ‘authenticity’</b> | <b>Relevance and cultural appropriateness of ‘understanding’</b> | <b>Relevance and cultural appropriateness of ‘consonance’</b> | <b>Relevance and cultural appropriateness of ‘specificity’</b> | <b>Relevance and cultural appropriateness of ‘embeddedness’</b> | <b>Relevance and cultural appropriateness of ‘endorsement’</b> | <b>Relevance and cultural appropriateness of ‘framing’</b> |
|---------------------------------------------|------------------------------------------------------------------------------------------------------------------------------------------------------------------------------------------|-----------------------------------------------------------------|------------------------------------------------------------------|---------------------------------------------------------------|----------------------------------------------------------------|-----------------------------------------------------------------|----------------------------------------------------------------|------------------------------------------------------------|
| <b>Moreno (2007)<br/>New York City, USA</b> | Explore the contextual risks of HIV-positive status and domestic violence against immigrant women                                                                                        | +                                                               | +++                                                              | +++                                                           | +                                                              | +                                                               | X                                                              | +++                                                        |
| <b>Nemoto (2005)<br/>San Francisco, USA</b> | Explore the cognitive, cultural and contextual factors that influence HIV-related risk behaviours among female immigrants who engage in sex work at massage parlours and owners/Managers | +                                                               | +++                                                              | +++                                                           | X                                                              | ++                                                              | X                                                              | +++                                                        |

| <b>First Author &amp; Location</b>            | <b>Study aims</b>                                                                                                       | <b>Relevance and cultural appropriateness of ‘authenticity’</b> | <b>Relevance and cultural appropriateness of ‘understanding’</b> | <b>Relevance and cultural appropriateness of ‘consonance’</b> | <b>Relevance and cultural appropriateness of ‘specificity’</b> | <b>Relevance and cultural appropriateness of ‘embeddedness’</b> | <b>Relevance and cultural appropriateness of ‘endorsement’</b> | <b>Relevance and cultural appropriateness of ‘framing’</b> |
|-----------------------------------------------|-------------------------------------------------------------------------------------------------------------------------|-----------------------------------------------------------------|------------------------------------------------------------------|---------------------------------------------------------------|----------------------------------------------------------------|-----------------------------------------------------------------|----------------------------------------------------------------|------------------------------------------------------------|
| <b>Poon (2002)<br/>Toronto, Canada</b>        | Explore cultural and social barriers influencing HIV-related risks among gay, lesbian, and bisexual young immigrants    | ++                                                              | X                                                                | ++                                                            | X                                                              | ++                                                              | X                                                              | +++                                                        |
| <b>Rhodes (2007)<br/>North Carolina, USA</b>  | Explore cultural and social determinants of HIV risk and identify potential intervention approaches among immigrant men | +                                                               | ++                                                               | ++                                                            | X                                                              | ++                                                              | X                                                              | +++                                                        |
| <b>Shedlin (2005)<br/>New York State, USA</b> | Explore social and behavioural factors influencing HIV risk among newly arrived immigrants                              | +                                                               | ++                                                               | +++                                                           | X                                                              | +++                                                             | X                                                              | +++                                                        |

| <b>First Author &amp; Location</b>           | <b>Study aims</b>                                                                                                                           | <b>Relevance and cultural appropriateness of ‘authenticity’</b> | <b>Relevance and cultural appropriateness of ‘understanding’</b> | <b>Relevance and cultural appropriateness of ‘consonance’</b> | <b>Relevance and cultural appropriateness of ‘specificity’</b> | <b>Relevance and cultural appropriateness of ‘embeddedness’</b> | <b>Relevance and cultural appropriateness of ‘endorsement’</b> | <b>Relevance and cultural appropriateness of ‘framing’</b> |
|----------------------------------------------|---------------------------------------------------------------------------------------------------------------------------------------------|-----------------------------------------------------------------|------------------------------------------------------------------|---------------------------------------------------------------|----------------------------------------------------------------|-----------------------------------------------------------------|----------------------------------------------------------------|------------------------------------------------------------|
| <b>Shedlin (2002)<br/>New York City, USA</b> | Explore predominant cultural influences social regarding sex work, drug use and HIV/AIDS among immigrants with very high risks for HIV/AIDS | X                                                               | +                                                                | +++                                                           | +++                                                            | +++                                                             | ++                                                             | +++                                                        |
| <b>Shedlin (2004)<br/>New York City, USA</b> | Explore perceptions, beliefs experiences and knowledge of care issues for immigrants most of whom were living with HIV                      | X                                                               | +++                                                              | +++                                                           | ++                                                             | +                                                               | X                                                              | +++                                                        |

| <b>First Author &amp; Location</b>                 | <b>Study aims</b>                                                                                                            | <b>Relevance and cultural appropriateness of ‘authenticity’</b> | <b>Relevance and cultural appropriateness of ‘understanding’</b> | <b>Relevance and cultural appropriateness of ‘consonance’</b> | <b>Relevance and cultural appropriateness of ‘specificity’</b> | <b>Relevance and cultural appropriateness of ‘embeddedness’</b> | <b>Relevance and cultural appropriateness of ‘endorsement’</b> | <b>Relevance and cultural appropriateness of ‘framing’</b> |
|----------------------------------------------------|------------------------------------------------------------------------------------------------------------------------------|-----------------------------------------------------------------|------------------------------------------------------------------|---------------------------------------------------------------|----------------------------------------------------------------|-----------------------------------------------------------------|----------------------------------------------------------------|------------------------------------------------------------|
| <b>Steel (2003)<br/>Sweden</b>                     | Explore the impact of pre-migration trauma on HIV risk behaviour among refugees post-settlement (relevant to HIV prevention) | X                                                               | X                                                                | +                                                             | X                                                              | X                                                               | X                                                              | ++                                                         |
| <b>Wilson (2004)<br/>New York City, USA</b>        | Explore experiences of, and responses to, social discrimination among gay immigrants                                         | +                                                               | X                                                                | +                                                             | +                                                              | X                                                               | X                                                              | +++                                                        |
| <b>Yoshikawa (2003)<br/>Northeastern city, USA</b> | Explore the experiences of immigrant educators to implement culturally anchored HIV prevention among immigrants              | ++                                                              | ++                                                               | +++                                                           | ++                                                             | +++                                                             | ++                                                             | +++                                                        |

| <b>First Author &amp; Location</b>                  | <b>Study aims</b>                                                                   | <b>Relevance and cultural appropriateness of 'authenticity'</b> | <b>Relevance and cultural appropriateness of 'understanding'</b> | <b>Relevance and cultural appropriateness of 'consonance'</b> | <b>Relevance and cultural appropriateness of 'specificity'</b> | <b>Relevance and cultural appropriateness of 'embeddedness'</b> | <b>Relevance and cultural appropriateness of 'endorsement'</b> | <b>Relevance and cultural appropriateness of 'framing'</b> |
|-----------------------------------------------------|-------------------------------------------------------------------------------------|-----------------------------------------------------------------|------------------------------------------------------------------|---------------------------------------------------------------|----------------------------------------------------------------|-----------------------------------------------------------------|----------------------------------------------------------------|------------------------------------------------------------|
| <b>Zuniga (2006), San Diego/Tijuana, USA/Mexico</b> | Explore barriers and facilitators to service utilisation by HIV-positive immigrants | X                                                               | +++                                                              | +                                                             | +                                                              | +                                                               | X                                                              | ++                                                         |
